# Supplementary material
Source: Springer Nature journal article supplement (https://www.springermedizin.de/resource/supplementary/12963_2010_112_MOESM4_ESM.pdf/9572682)

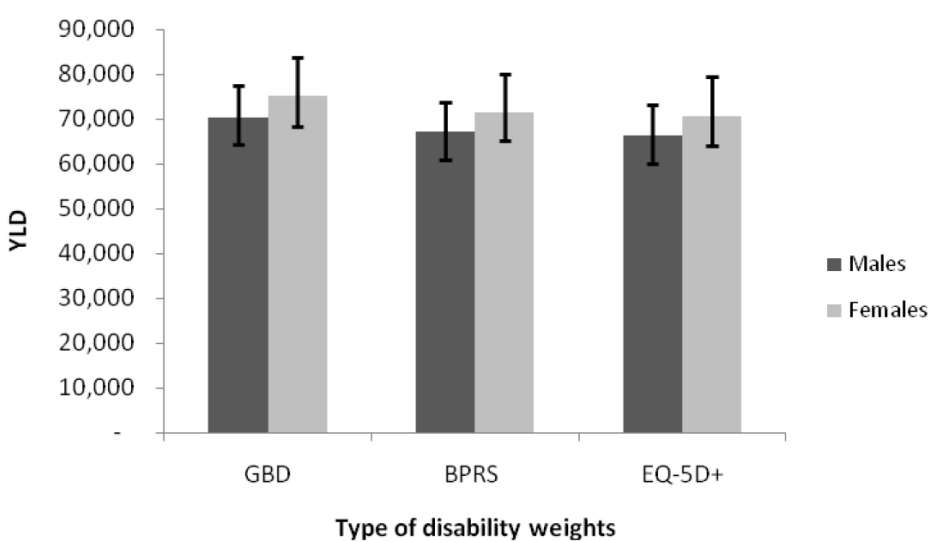

Supplement: MOESM4 [file 9572682]
